# Supplementary material for: Effect of Drying Methods on Volatile Compounds of Citrus reticulata Ponkan and Chachi Peels as Characterized by GC-MS and GC-IMS
Source: MDPI journal article supplement (doi:10.3390/foods11172662), 2022-09-01
Supplement: s1 [file s1]

## Supplementary Material

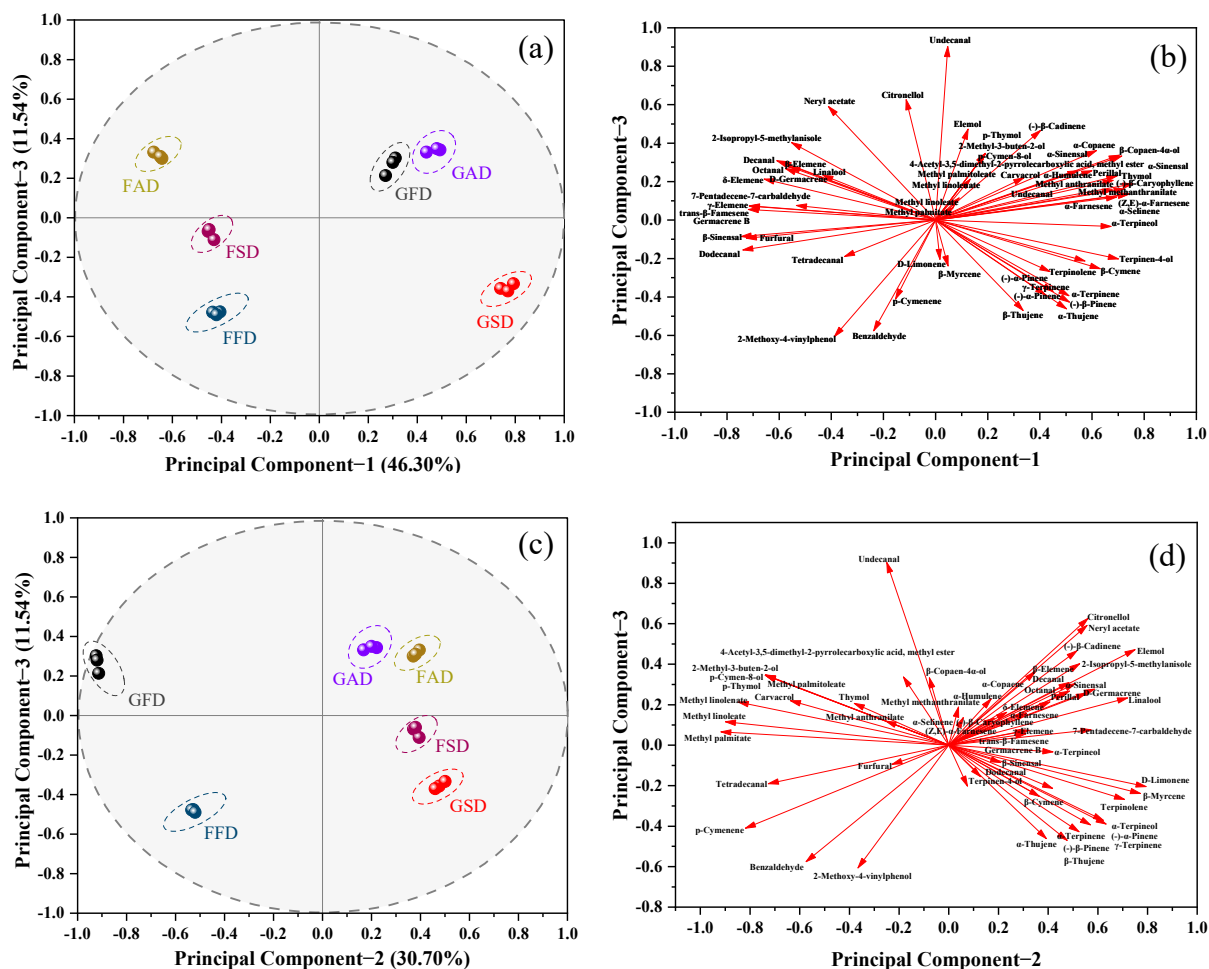

**Figure S1.** Plots of principal component scores (a, principal component-1 vs. principal component-3; c, principal component-2 vs. principal component-3) and loadings (b, principal component-1 vs. principal component-3; d, principal component-2 vs. principal component-3) in PCA analysis for GC-MS data of dried Chachi and Ponkan peels prepared from three drying methods.

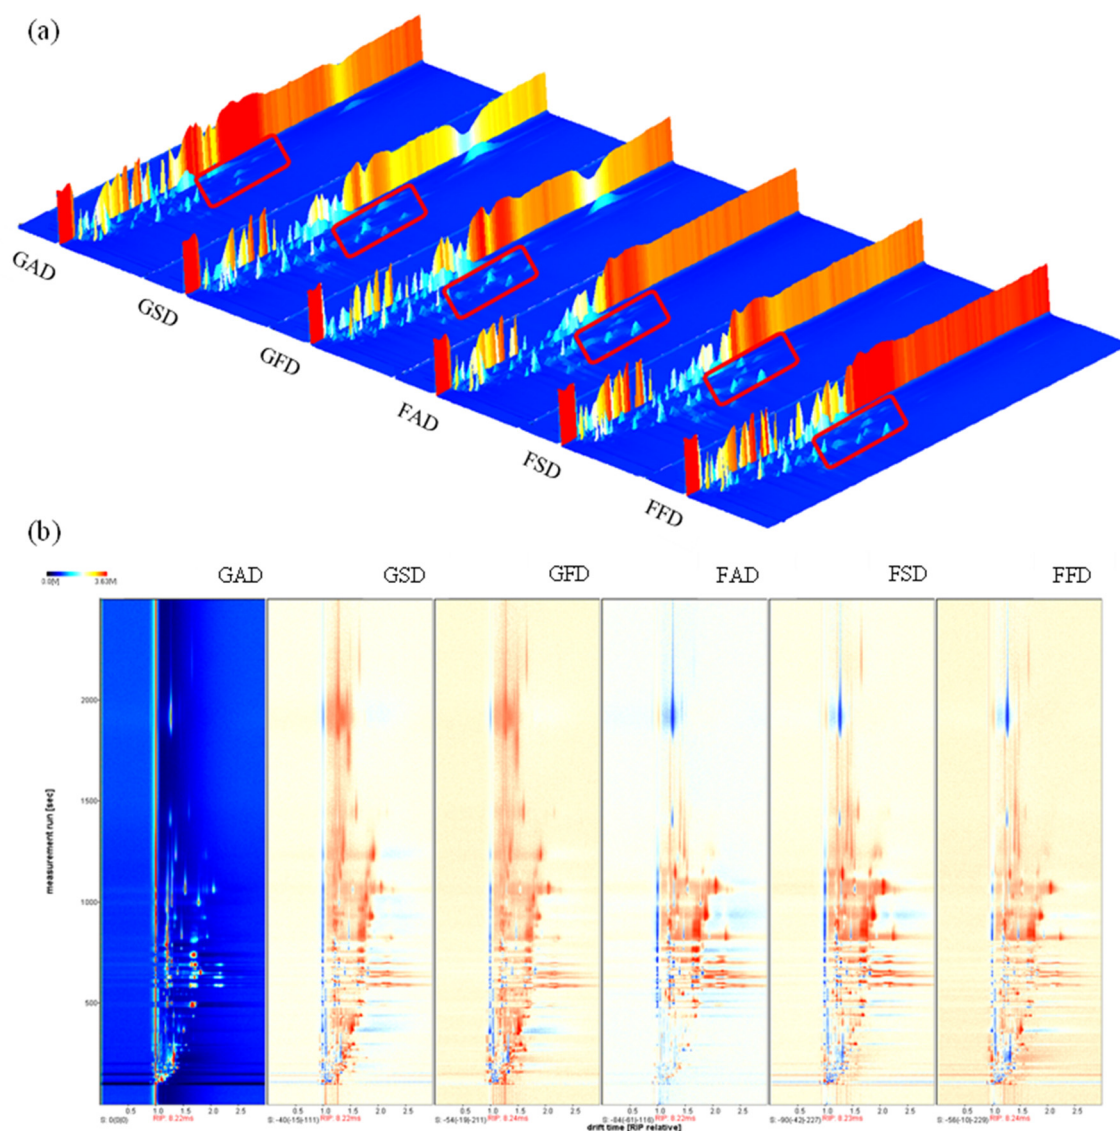

**Figure S2.** 3D-topographic view (a) and vertical view (b) of volatile compounds in dried Chachi and Ponkan peels prepared from three drying methods. ((a), X-, Y-, and Z-axes represent the ion migration time, retention time of GC, and ion peak strength, respectively). (b), GAD was used as a reference. The colors indicate the signal strengths of the individual compounds. Red means high intensity, and blue means low intensity.) of volatile compounds in dried Chachi and Ponkan peels prepared from three drying methods.)

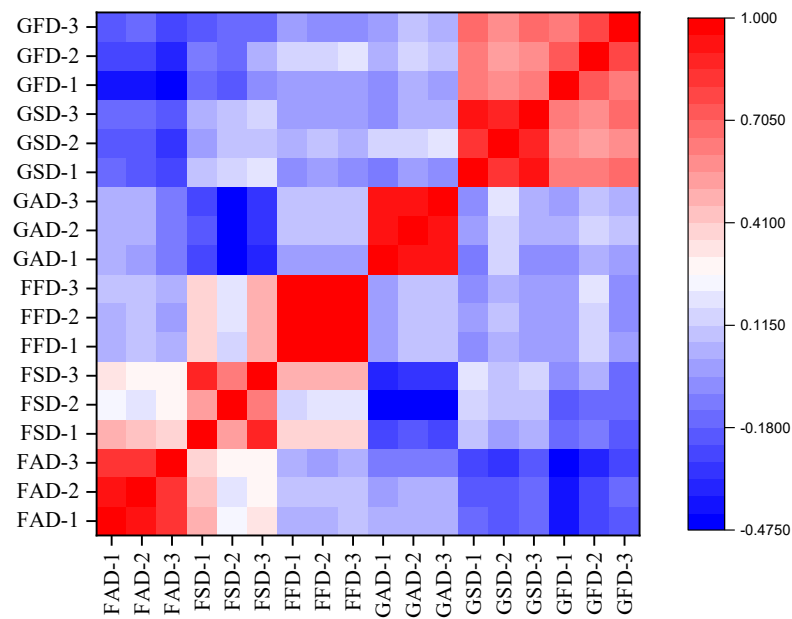

**Figure S3.** Correlation between dried citrus peel samples of different groups (FAD, FSD, FFD, GAD, GSD, GFD) as characterized by GC-IMS analysis.



**Table S1.** The relative percentage content of each compound in GC–MS total ion chromatogram of different dried citrus peel samples through peak area normalization.

| Compound                                                         | CAS         | Formula                                         | FAD                          | FSD                           | FDD                           | GAD                           | GSD                           | GFD                           |
|------------------------------------------------------------------|-------------|-------------------------------------------------|------------------------------|-------------------------------|-------------------------------|-------------------------------|-------------------------------|-------------------------------|
| Alcohols                                                         |             |                                                 |                              |                               |                               |                               |                               |                               |
| 2-Methyl-3-buten-2-ol                                            | 115-18-4    | C <sub>5</sub> H <sub>10</sub> O                | nd                           | nd                            | nd                            | nd                            | nd                            | 0.30±0.01                     |
| Linalool                                                         | 78-70-6     | C <sub>10</sub> H <sub>18</sub> O               | 3.84±0.04 <sup>a</sup>       | 2.95±0.05 <sup>b</sup>        | 1.53±0.03 <sup>c</sup>        | 0.93±0.00 <sup>d</sup>        | 0.61±0.00 <sup>e</sup>        | 0.27±0.00 <sup>f</sup>        |
| Terpinen-4-ol                                                    | 562-74-3    | C <sub>10</sub> H <sub>18</sub> O               | 0.43±0.00 <sup>d</sup>       | 0.38±0.00 <sup>d</sup>        | 1.17±0.07 <sup>a</sup>        | 0.45±0.01 <sup>d</sup>        | 0.67±0.04 <sup>c</sup>        | 0.93±0.01 <sup>b</sup>        |
| p-Cymen-8-ol                                                     | 1197-01-9   | C <sub>10</sub> H <sub>14</sub> O               | nd                           | nd                            | nd                            | nd                            | nd                            | 0.29±0.00                     |
| α-Terpineol                                                      | 98-55-5     | C <sub>10</sub> H <sub>18</sub> O               | 2.54±0.04 <sup>b</sup>       | 1.96±0.04 <sup>c</sup>        | 4.44±0.18 <sup>a</sup>        | 1.95±0.01 <sup>c</sup>        | 1.96±0.03 <sup>c</sup>        | 2.66±0.03 <sup>b</sup>        |
| Citronellol                                                      | 106-22-9    | C <sub>10</sub> H <sub>20</sub> O               | 0.59±0.02 <sup>a</sup>       | 0.26±0.02 <sup>b</sup>        | nd                            | 0.17±0.03 <sup>c</sup>        | 0.13±0.00 <sup>c</sup>        | 0.25±0.04 <sup>b</sup>        |
| Elemol                                                           | 639-99-6    | C <sub>15</sub> H <sub>26</sub> O               | 0.53±0.01 <sup>a</sup>       | 0.21±0.02 <sup>c</sup>        | nd                            | 0.37±0.02 <sup>b</sup>        | 0.15±0.00 <sup>d</sup>        | nd                            |
| β-Copaen-4α-ol                                                   | 124753-76-0 | C <sub>15</sub> H <sub>24</sub> O               | nd                           | nd                            | nd                            | 0.54±0.00 <sup>b</sup>        | 0.28±0.03 <sup>c</sup>        | 0.63±0.01 <sup>a</sup>        |
|                                                                  |             | <b>Sum</b>                                      | <b>7.93±0.11<sup>a</sup></b> | <b>5.77±0.06<sup>c</sup></b>  | <b>7.14±0.29<sup>b</sup></b>  | <b>4.52±0.01<sup>e</sup></b>  | <b>3.89±0.10<sup>f</sup></b>  | <b>5.33±0.06<sup>d</sup></b>  |
| Aromatic hydrocarbons and ethers                                 |             |                                                 |                              |                               |                               |                               |                               |                               |
| β-Cymene                                                         | 535-77-3    | C <sub>10</sub> H <sub>14</sub>                 | 0.31±0.00 <sup>c</sup>       | 0.28±0.00 <sup>c</sup>        | 0.55±0.10 <sup>b</sup>        | 0.41±0.01 <sup>c</sup>        | 0.88±0.01 <sup>a</sup>        | 0.56±0.08 <sup>b</sup>        |
| p-Cymenene                                                       | 1195-32-0   | C <sub>10</sub> H <sub>12</sub>                 | nd                           | nd                            | 2.19±0.21 <sup>a</sup>        | nd                            | nd                            | 0.51±0.02 <sup>b</sup>        |
| 2-Isopropyl-5-methylanisole                                      | 1076-56-8   | C <sub>11</sub> H <sub>16</sub> O               | 0.93±0.03 <sup>a</sup>       | 0.52±0.01 <sup>b</sup>        | nd                            | 0.18±0.01 <sup>c</sup>        | nd                            | nd                            |
|                                                                  |             | <b>Sum</b>                                      | <b>1.24±0.03<sup>b</sup></b> | <b>0.81±0.00<sup>cd</sup></b> | <b>2.75±0.31<sup>a</sup></b>  | <b>0.59±0.01<sup>d</sup></b>  | <b>0.88±0.01<sup>cd</sup></b> | <b>1.07±0.09<sup>bc</sup></b> |
| Phenols                                                          |             |                                                 |                              |                               |                               |                               |                               |                               |
| p-Thymol                                                         | 3228-02-2   | C <sub>10</sub> H <sub>14</sub> O               | nd                           | nd                            | nd                            | nd                            | nd                            | 0.44±0.01                     |
| Thymol                                                           | 89-83-8     | C <sub>10</sub> H <sub>14</sub> O               | 0.63±0.01 <sup>cd</sup>      | 0.47±0.05 <sup>d</sup>        | 1.83±0.17 <sup>a</sup>        | 0.84±0.00 <sup>b</sup>        | 0.68±0.01 <sup>bc</sup>       | 1.86±0.02 <sup>a</sup>        |
| Carvacrol                                                        | 499-75-2    | C <sub>10</sub> H <sub>14</sub> O               | nd                           | nd                            | nd                            | nd                            | 0.14±0.02 <sup>b</sup>        | 1.10±0.00 <sup>a</sup>        |
| 2-Methoxy-4-vinylphenol                                          | 7786-61-0   | C <sub>9</sub> H <sub>10</sub> O <sub>2</sub>   | 0.84±0.02 <sup>b</sup>       | 0.46±0.02 <sup>c</sup>        | 8.20±0.34 <sup>a</sup>        | 0.15±0.00 <sup>c</sup>        | 0.13±0.03 <sup>c</sup>        | 0.30±0.02 <sup>c</sup>        |
|                                                                  |             | <b>Sum</b>                                      | <b>1.47±0.01<sup>c</sup></b> | <b>0.92±0.07<sup>d</sup></b>  | <b>10.03±0.51<sup>a</sup></b> | <b>1.00±0.00<sup>cd</sup></b> | <b>0.95±0.01<sup>cd</sup></b> | <b>3.70±0.00<sup>b</sup></b>  |
| N-containing compounds                                           |             |                                                 |                              |                               |                               |                               |                               |                               |
| Methyl anthranilate                                              | 134-20-3    | C <sub>8</sub> H <sub>9</sub> NO <sub>2</sub>   | nd                           | nd                            | nd                            | 0.15±0.01 <sup>c</sup>        | 0.20±0.00 <sup>b</sup>        | 0.48±0.03 <sup>a</sup>        |
| Methyl methanthranilate                                          | 85-91-6     | C <sub>9</sub> H <sub>11</sub> NO <sub>2</sub>  | 5.47±0.63 <sup>e</sup>       | 1.92±0.13 <sup>f</sup>        | 10.87±0.78 <sup>d</sup>       | 42.31±0.37 <sup>b</sup>       | 30.71±0.39 <sup>c</sup>       | 47.52±0.09 <sup>a</sup>       |
| 4-Acetyl-3,5-dimethyl-2-pyrrole<br>carboxylic acid, methyl ester | 89909-47-7  | C <sub>10</sub> H <sub>13</sub> NO <sub>3</sub> | nd                           | nd                            | nd                            | 0.16±0.04 <sup>b</sup>        | 0.09±0.00 <sup>c</sup>        | 0.24±0.01 <sup>a</sup>        |
|                                                                  |             | <b>Sum</b>                                      | <b>5.47±0.63<sup>e</sup></b> | <b>1.92±0.13<sup>f</sup></b>  | <b>10.87±0.78<sup>d</sup></b> | <b>42.61±0.32<sup>b</sup></b> | <b>31.00±0.39<sup>c</sup></b> | <b>48.23±0.07<sup>a</sup></b> |
| Aldehydes                                                        |             |                                                 |                              |                               |                               |                               |                               |                               |
| Furfural                                                         | 98-01-1     | C <sub>5</sub> H <sub>4</sub> O <sub>2</sub>    | 1.57±0.22 <sup>b</sup>       | 0.91±0.00 <sup>c</sup>        | 4.01±0.17 <sup>a</sup>        | 0.35±0.03 <sup>d</sup>        | 0.12±0.00 <sup>d</sup>        | 0.80±0.05 <sup>c</sup>        |
| Benzaldehyde                                                     | 100-52-7    | C <sub>7</sub> H <sub>6</sub> O                 | nd                           | nd                            | 1.29±0.01 <sup>a</sup>        | nd                            | nd                            | 0.18±0.05 <sup>b</sup>        |
| Octanal                                                          | 124-13-0    | C <sub>8</sub> H <sub>16</sub> O                | 0.28±0.00 <sup>a</sup>       | 0.19±0.00 <sup>b</sup>        | nd                            | nd                            | nd                            | nd                            |

|                              |            |                                   |                               |                               |                               |                               |                               |                              |
|------------------------------|------------|-----------------------------------|-------------------------------|-------------------------------|-------------------------------|-------------------------------|-------------------------------|------------------------------|
| Decanal                      | 112-31-2   | C <sub>10</sub> H <sub>20</sub> O | 1.77±0.00 <sup>b</sup>        | 1.12±0.02 <sup>c</sup>        | 1.92±0.07 <sup>a</sup>        | 0.48±0.01 <sup>e</sup>        | 0.28±0.00 <sup>f</sup>        | 0.62±0.06 <sup>d</sup>       |
| Perillal                     | 2111-75-3  | C <sub>10</sub> H <sub>14</sub> O | 0.68±0.01 <sup>b</sup>        | 0.53±0.01 <sup>d</sup>        | nd                            | 0.76±0.01 <sup>a</sup>        | 0.62±0.01 <sup>c</sup>        | 0.60±0.00 <sup>c</sup>       |
| Undecanal                    | 112-44-7   | C <sub>11</sub> H <sub>22</sub> O | 0.24±0.01                     | nd                            | nd                            | 0.13±0.00 <sup>b</sup>        | nd                            | 0.23±0.01 <sup>a</sup>       |
| Dodecanal                    | 112-54-9   | C <sub>12</sub> H <sub>24</sub> O | 1.81±0.01 <sup>b</sup>        | 0.83±0.04 <sup>c</sup>        | 3.46±0.14 <sup>a</sup>        | nd                            | nd                            | nd                           |
| Tetradecanal                 | 124-25-4   | C <sub>14</sub> H <sub>28</sub> O | 0.26±0.03 <sup>b</sup>        | nd                            | 1.21±0.10 <sup>a</sup>        | nd                            | nd                            | 0.31±0.00 <sup>b</sup>       |
| β-Sinensal                   | 60066-88-8 | C <sub>15</sub> H <sub>22</sub> O | 3.08±0.20 <sup>b</sup>        | 1.60±0.00 <sup>c</sup>        | 4.87±0.19 <sup>a</sup>        | nd                            | nd                            | nd                           |
| α-Sinensal                   | 17909-77-2 | C <sub>15</sub> H <sub>22</sub> O | 4.01±0.32 <sup>b</sup>        | 2.37±0.01 <sup>c</sup>        | 3.56±0.36 <sup>b</sup>        | 7.62±0.33 <sup>a</sup>        | 3.90±0.25 <sup>b</sup>        | 2.40±0.17 <sup>c</sup>       |
| 7-Pentadecene-7-carbaldehyde | — —        | C <sub>16</sub> H <sub>30</sub> O | 1.45±0.09 <sup>a</sup>        | 1.29±0.02 <sup>b</sup>        | 0.59±0.03 <sup>c</sup>        | 0.14±0.04 <sup>d</sup>        | 0.15±0.01 <sup>d</sup>        | nd                           |
|                              |            | <b>Sum</b>                        | <b>15.16±0.84<sup>b</sup></b> | <b>8.83±0.05<sup>c</sup></b>  | <b>20.91±0.44<sup>a</sup></b> | <b>9.48±0.32<sup>c</sup></b>  | <b>5.07±0.27<sup>d</sup></b>  | <b>5.14±0.02<sup>d</sup></b> |
| <b>Monoterpenes</b>          |            |                                   |                               |                               |                               |                               |                               |                              |
| α-Thujene                    | 2867-05-2  | C <sub>10</sub> H <sub>16</sub>   | nd                            | nd                            | nd                            | nd                            | 0.27±0.00                     | nd                           |
| (-)-α-Pinene                 | 7785-26-4  | C <sub>10</sub> H <sub>16</sub>   | 0.29±0.00 <sup>c</sup>        | 0.62±0.01 <sup>b</sup>        | nd                            | 0.23±0.00 <sup>d</sup>        | 0.86±0.03 <sup>a</sup>        | nd                           |
| β-Thujene                    | 28634-89-1 | C <sub>10</sub> H <sub>16</sub>   | nd                            | 0.16±0.01 <sup>a</sup>        | nd                            | nd                            | 0.10±0.00 <sup>b</sup>        | nd                           |
| (-)-β-Pinene                 | 18172-67-3 | C <sub>10</sub> H <sub>16</sub>   | nd                            | 0.30±0.01 <sup>b</sup>        | nd                            | 0.17±0.01 <sup>c</sup>        | 0.65±0.02 <sup>a</sup>        | nd                           |
| β-Myrcene                    | 123-35-3   | C <sub>10</sub> H <sub>16</sub>   | 0.91±0.00 <sup>b</sup>        | 1.62±0.02 <sup>a</sup>        | nd                            | 0.27±0.01 <sup>d</sup>        | 0.79±0.02 <sup>c</sup>        | nd                           |
| α-Terpinene                  | 99-86-5    | C <sub>10</sub> H <sub>16</sub>   | nd                            | 0.27±0.01 <sup>b</sup>        | nd                            | 0.17±0.00 <sup>c</sup>        | 0.43±0.00 <sup>a</sup>        | nd                           |
| D-limonene                   | 5989-27-5  | C <sub>10</sub> H <sub>16</sub>   | 39.87±0.32 <sup>b</sup>       | 60.73±0.01 <sup>a</sup>       | 6.89±0.83 <sup>e</sup>        | 12.17±0.28 <sup>d</sup>       | 28.76±0.58 <sup>c</sup>       | 2.02±0.67 <sup>f</sup>       |
| γ-Terpinene                  | 99-85-4    | C <sub>10</sub> H <sub>16</sub>   | 3.97±0.02 <sup>c</sup>        | 6.45±0.00 <sup>b</sup>        | 1.09±0.10 <sup>e</sup>        | 3.25±0.09 <sup>d</sup>        | 10.09±0.14 <sup>a</sup>       | 0.55±0.14 <sup>f</sup>       |
| Terpinolene                  | 586-62-9   | C <sub>10</sub> H <sub>16</sub>   | 0.53±0.00 <sup>c</sup>        | 0.57±0.01 <sup>b</sup>        | nd                            | 0.41±0.00 <sup>d</sup>        | 0.85±0.02 <sup>a</sup>        | nd                           |
|                              |            | <b>Sum</b>                        | <b>45.57±0.35<sup>b</sup></b> | <b>70.72±0.02<sup>a</sup></b> | <b>7.98±0.93<sup>e</sup></b>  | <b>16.66±0.40<sup>d</sup></b> | <b>42.80±0.77<sup>c</sup></b> | <b>2.56±0.81<sup>f</sup></b> |
| <b>Sesquiterpenes</b>        |            |                                   |                               |                               |                               |                               |                               |                              |
| δ-Elemene                    | 20307-84-0 | C <sub>15</sub> H <sub>24</sub>   | 3.66±0.01 <sup>a</sup>        | 1.76±0.03 <sup>b</sup>        | 1.89±0.18 <sup>b</sup>        | 0.11±0.02 <sup>c</sup>        | nd                            | nd                           |
| α-Copaene                    | 3856-25-5  | C <sub>15</sub> H <sub>24</sub>   | 0.50±0.00 <sup>b</sup>        | 0.21±0.00 <sup>d</sup>        | 0.51±0.04 <sup>b</sup>        | 0.78±0.02 <sup>a</sup>        | 0.43±0.01 <sup>c</sup>        | 0.50±0.00 <sup>b</sup>       |
| β-Elemene                    | 515-13-9   | C <sub>15</sub> H <sub>24</sub>   | 2.12±0.02 <sup>a</sup>        | 1.03±0.03 <sup>c</sup>        | 1.52±0.03 <sup>b</sup>        | 0.37±0.00 <sup>d</sup>        | 0.18±0.00 <sup>f</sup>        | 0.27±0.00 <sup>e</sup>       |
| (-)-β-Caryophyllene          | 87-44-5    | C <sub>15</sub> H <sub>24</sub>   | 0.50±0.07 <sup>c</sup>        | 0.20±0.02 <sup>d</sup>        | 0.52±0.03 <sup>c</sup>        | 2.81±0.04 <sup>a</sup>        | 1.95±0.08 <sup>b</sup>        | 1.92±0.02 <sup>b</sup>       |
| γ-Elemene                    | 29873-99-2 | C <sub>15</sub> H <sub>24</sub>   | 1.77±0.00 <sup>a</sup>        | 0.89±0.01 <sup>b</sup>        | 1.71±0.15 <sup>a</sup>        | nd                            | nd                            | nd                           |
| trans-β-Farnesene            | 18794-84-8 | C <sub>15</sub> H <sub>24</sub>   | 2.34±0.01 <sup>a</sup>        | 1.09±0.03 <sup>b</sup>        | 2.33±0.11 <sup>a</sup>        | nd                            | nd                            | nd                           |
| α-Humulene                   | 6753-98-6  | C <sub>15</sub> H <sub>24</sub>   | nd                            | nd                            | nd                            | 0.49±0.02 <sup>a</sup>        | 0.26±0.01 <sup>b</sup>        | 0.28±0.01 <sup>b</sup>       |
| D-Germacrene                 | 23986-74-5 | C <sub>15</sub> H <sub>24</sub>   | 3.24±0.04 <sup>a</sup>        | 1.50±0.01 <sup>c</sup>        | 2.08±0.18 <sup>b</sup>        | 0.62±0.02 <sup>d</sup>        | 0.25±0.01 <sup>e</sup>        | nd                           |
| (Z,E)-α-Farnesene            | 26560-14-5 | C <sub>15</sub> H <sub>24</sub>   | nd                            | nd                            | nd                            | 0.46±0.00 <sup>a</sup>        | 0.32±0.01 <sup>b</sup>        | 0.33±0.00 <sup>b</sup>       |
| α-Selinene                   | 473-13-2   | C <sub>15</sub> H <sub>24</sub>   | nd                            | nd                            | 0.88±0.05 <sup>d</sup>        | 1.75±0.04 <sup>a</sup>        | 1.13±0.03 <sup>c</sup>        | 1.51±0.02 <sup>b</sup>       |
| α-Farnesene                  | 502-61-4   | C <sub>15</sub> H <sub>24</sub>   | 3.23±0.05 <sup>d</sup>        | 1.50±0.02 <sup>e</sup>        | 3.17±0.23 <sup>d</sup>        | 16.10±0.26 <sup>a</sup>       | 10.02±0.37 <sup>b</sup>       | 7.19±0.18 <sup>c</sup>       |
| (-)-β-Cadinene               | 523-47-7   | C <sub>15</sub> H <sub>24</sub>   | 2.01±0.04 <sup>b</sup>        | 1.00±0.00 <sup>e</sup>        | 2.72±0.05 <sup>a</sup>        | 1.49±0.01 <sup>c</sup>        | 0.86±0.03 <sup>f</sup>        | 1.27±0.02 <sup>d</sup>       |
| Germacrene B                 | 15423-57-1 | C <sub>15</sub> H <sub>24</sub>   | 3.33±0.03 <sup>a</sup>        | 1.66±0.00 <sup>b</sup>        | 3.44±0.62 <sup>a</sup>        | nd                            | nd                            | nd                           |

|                     |           |                                                | <b>Sum</b>                   | <b>22.71±0.01<sup>b</sup></b> | <b>10.84±0.12<sup>f</sup></b> | <b>20.77±1.58<sup>c</sup></b> | <b>25.00±0.40<sup>a</sup></b> | <b>15.41±0.56<sup>d</sup></b> | <b>13.28±0.25<sup>e</sup></b> |
|---------------------|-----------|------------------------------------------------|------------------------------|-------------------------------|-------------------------------|-------------------------------|-------------------------------|-------------------------------|-------------------------------|
| <b>Esters</b>       |           |                                                |                              |                               |                               |                               |                               |                               |                               |
| Neryl acetate       | 141-12-8  | C <sub>12</sub> H <sub>20</sub> O <sub>2</sub> | 0.46±0.01 <sup>a</sup>       | 0.20±0.01 <sup>b</sup>        | nd                            | 0.14±0.00 <sup>c</sup>        | nd                            | nd                            | nd                            |
| Methyl palmitoleate | 1120-25-8 | C <sub>17</sub> H <sub>32</sub> O <sub>2</sub> | nd                           | nd                            | nd                            | nd                            | nd                            | nd                            | 0.46±0.02                     |
| Methyl palmitate    | 112-39-0  | C <sub>17</sub> H <sub>34</sub> O <sub>2</sub> | nd                           | nd                            | 12.15±0.16 <sup>a</sup>       | nd                            | nd                            | nd                            | 10.72±0.31 <sup>b</sup>       |
| Methyl linoleate    | 112-63-0  | C <sub>19</sub> H <sub>34</sub> O <sub>2</sub> | nd                           | nd                            | 5.21±0.43 <sup>a</sup>        | nd                            | nd                            | nd                            | 5.59±0.03 <sup>a</sup>        |
| Methyl linolenate   | 301-00-8  | C <sub>19</sub> H <sub>32</sub> O <sub>2</sub> | nd                           | nd                            | 2.19±0.22 <sup>b</sup>        | nd                            | nd                            | nd                            | 3.92±0.15 <sup>a</sup>        |
| <b>Sum</b>          |           |                                                | <b>0.46±0.01<sup>c</sup></b> | <b>0.20±0.01<sup>c</sup></b>  | <b>19.55±0.80<sup>b</sup></b> | <b>0.14±0.00<sup>c</sup></b>  | <b>nd</b>                     | <b>nd</b>                     | <b>20.69±0.52<sup>a</sup></b> |
| <b>Total</b>        |           |                                                | <b>100.00%</b>               | <b>100.00%</b>                | <b>100.00%</b>                | <b>100.00%</b>                | <b>100.00%</b>                | <b>100.00%</b>                | <b>100.00%</b>                |

The term “nd” means the compound was not detected in sample. Different lower-case letters in the same row indicated the significant differences ( $P < 0.05$ ).
